# Supplementary material for: Early afterdepolarizations promote transmural reentry in ischemic human ventricles with reduced repolarization reserve
Source: PubMed Central journal article supplement (PMC4821233; doi:10.1016/j.pbiomolbio.2016.01.008), 2016-01

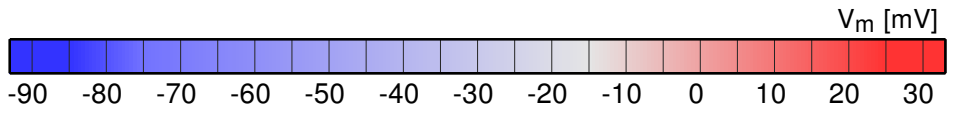

# No $I_{Kr}$ reduction

Epicardial surface

Endocardial surface

$V_m > -20$  [mV]

1295 ms

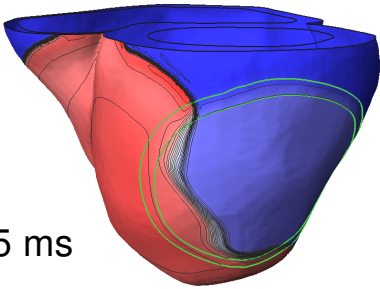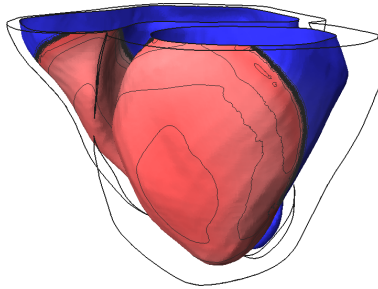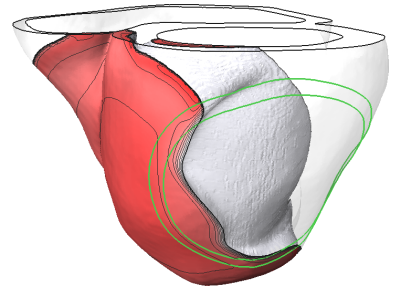

1360 ms

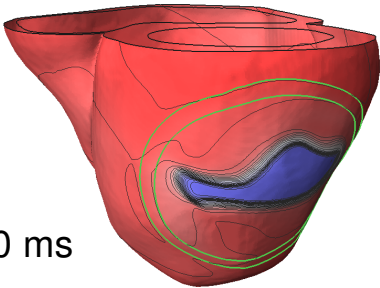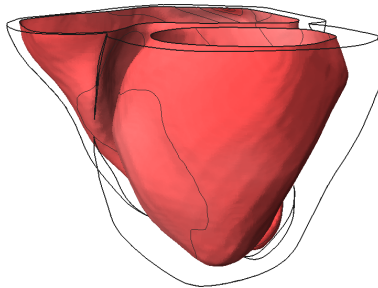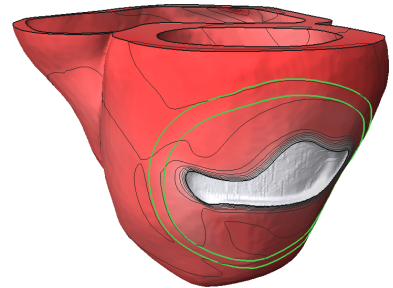

1385 ms

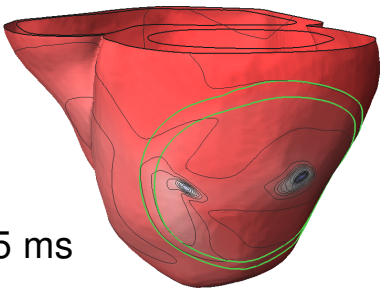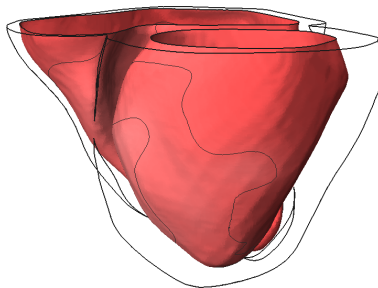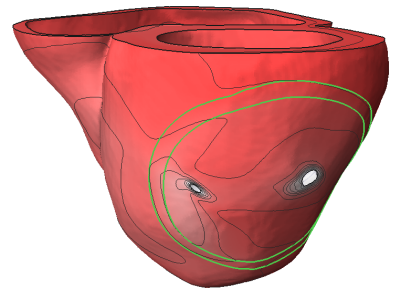

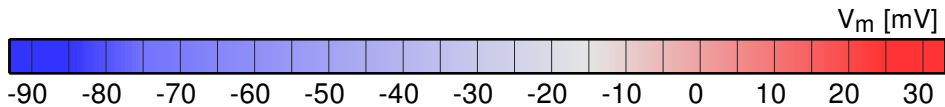

# 30% $I_{kr}$ reduction

Epicardial surface

Endocardial surface

$V_m > -20$  [mV]

1300 ms

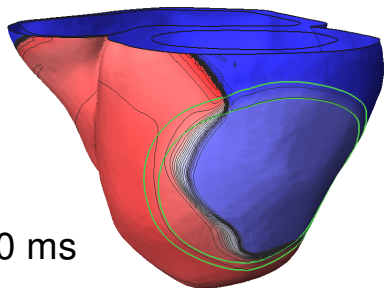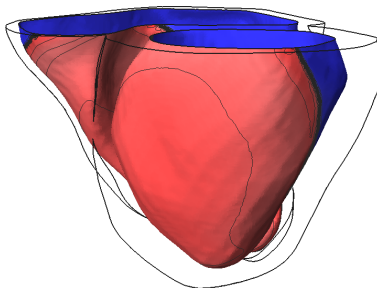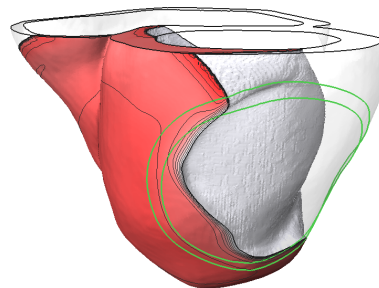

1340 ms

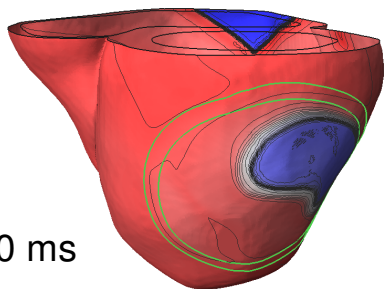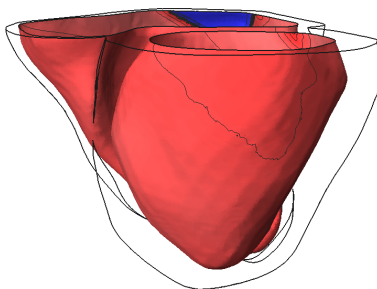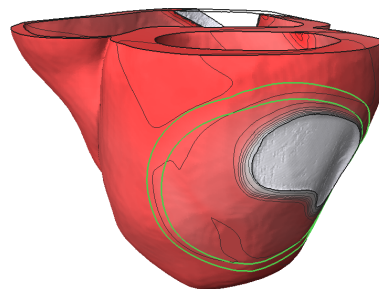

1350 ms

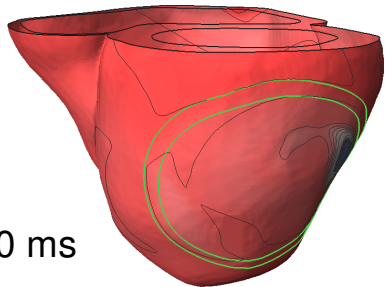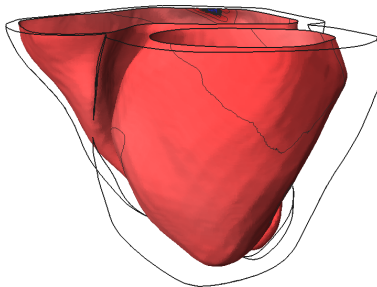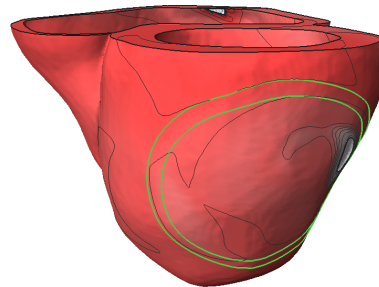

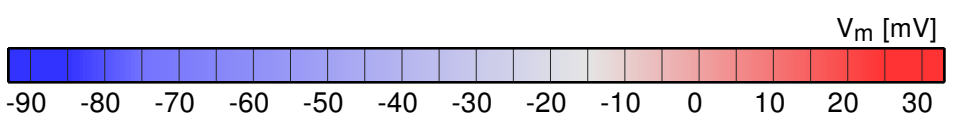

# 50% $I_{Kr}$ reduction

Epicardial surface

Endocardial surface

$V_m > -20$  [mV]

1315 ms

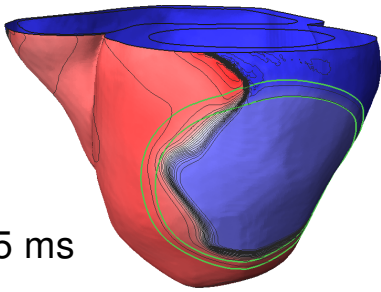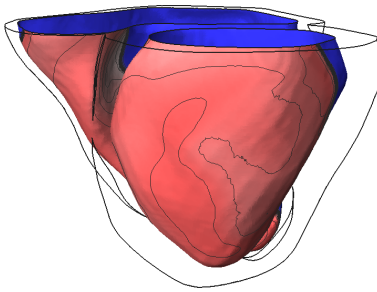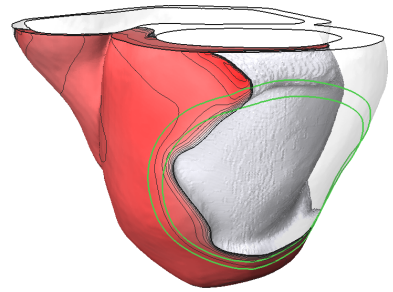

1360 ms

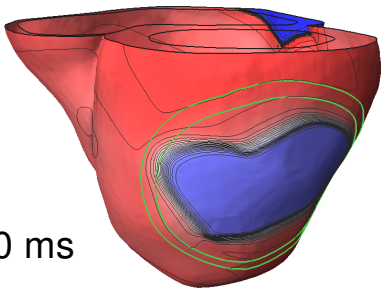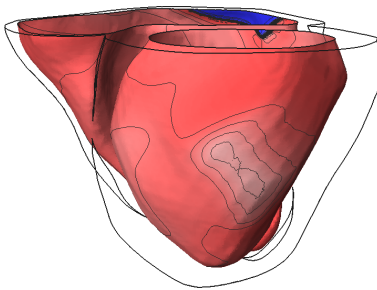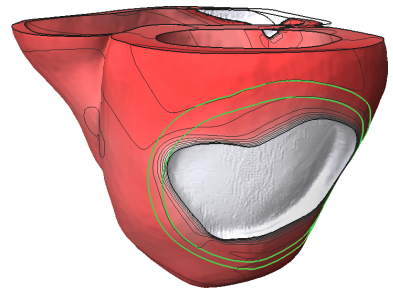

1460 ms

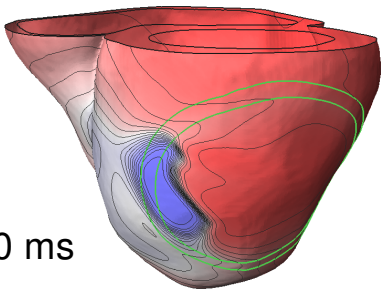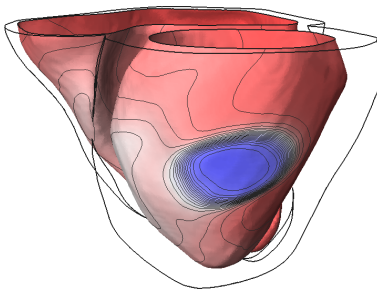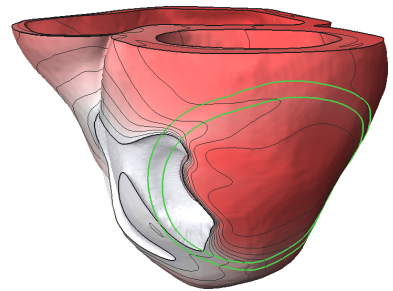

1580 ms

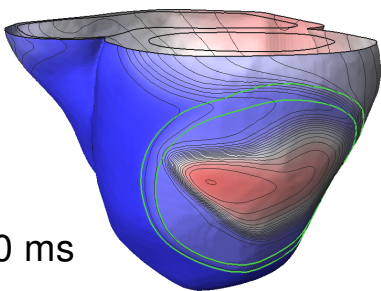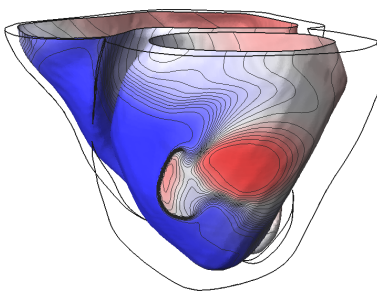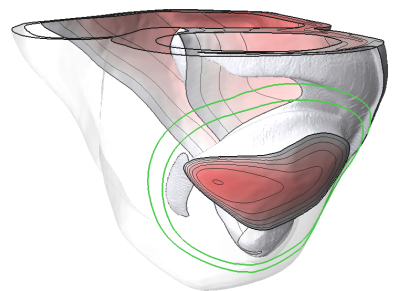

1810 ms

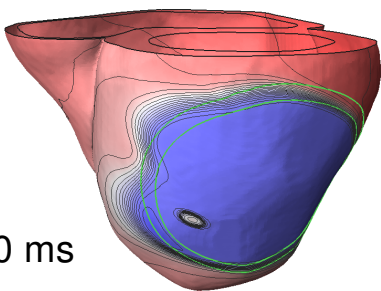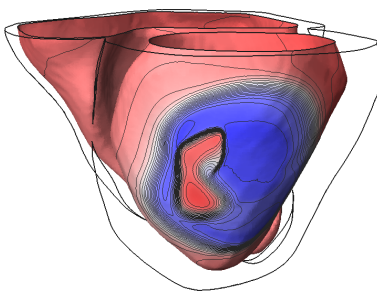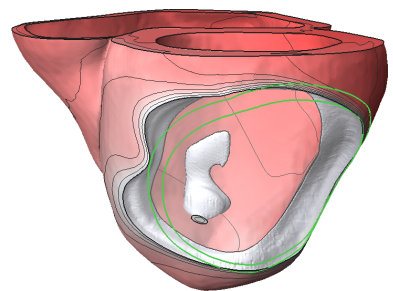

1900 ms

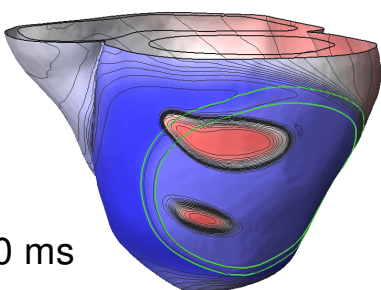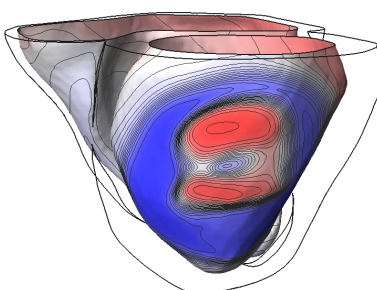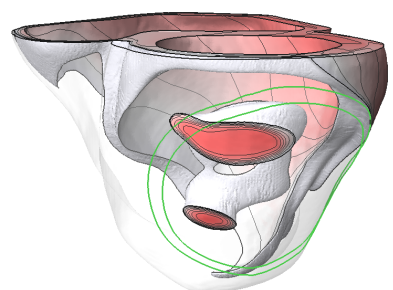

Supplement: mmc4.pdf [file mmc4.pdf]
